# Supplementary figures and images for: Induction of Immunological Antitumor Effects by the Combination of Adenovirus-Mediated Gene Transfer of B7-1 and Anti-Programmed Cell Death-1 Antibody in a Murine Squamous Cell Carcinoma Model
Source: MDPI journal article supplement (doi:10.3390/cancers16071359), 2024-03-30

# Supplementary Figure S1

Control

aPD-1

B7

aPD-1 + B7

Nuclei  
CD45

Nuclei  
CD3

Nuclei  
CD8

Nuclei  
FoxP3

Nuclei  
Ki67

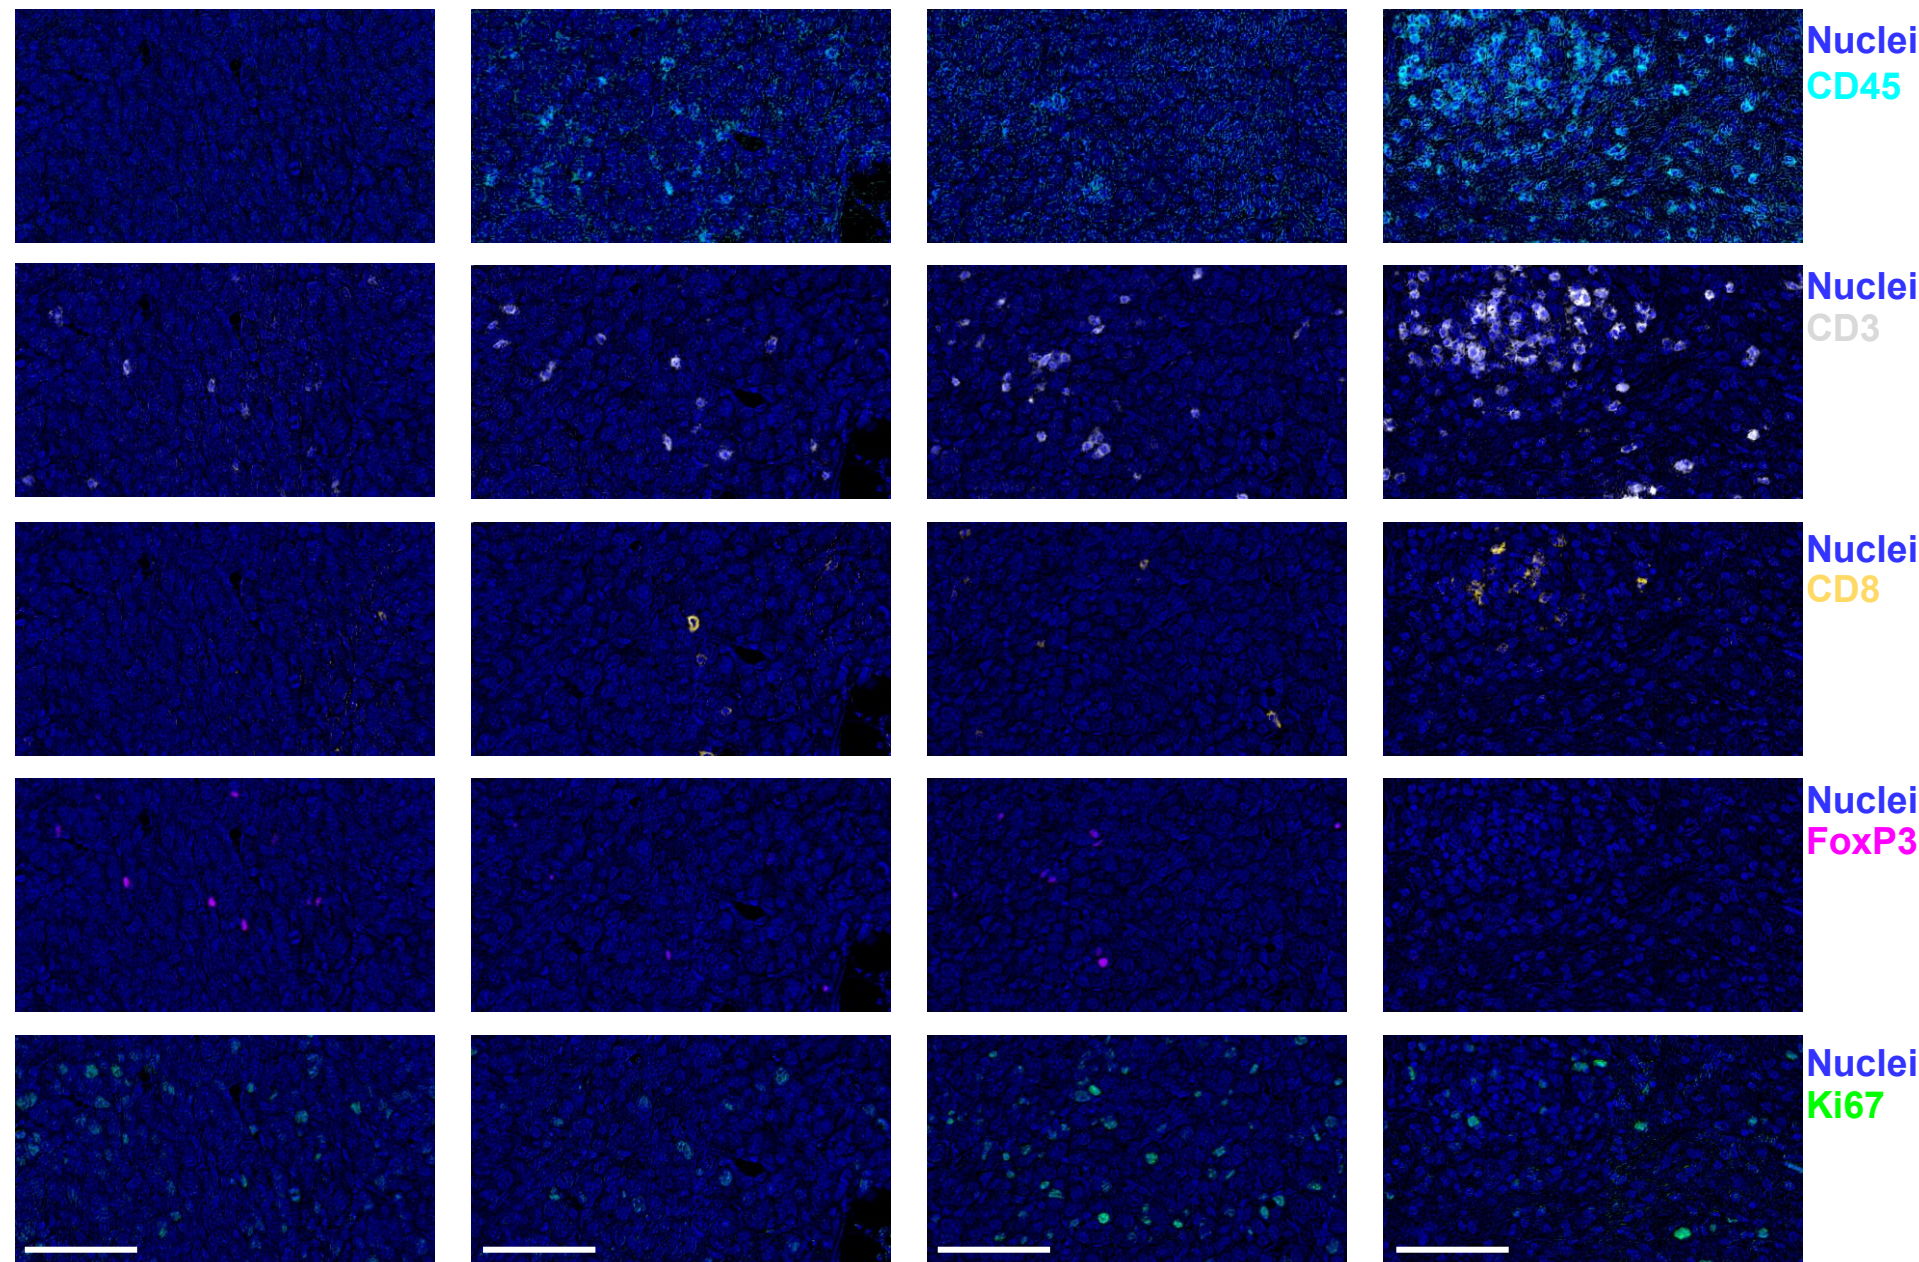

Supplement: s1 [file s1]
